# Supplementary material for: Structural and photoluminescent studies of lanthanide complexes with tripodal triRNTB (N-substituted tris(benzimidazol-2-ylmethyl)amine): ligand substituent, anionic and secondary ligand effects
Source: Royal Society of Chemistry journal article supplement (doi:10.1039/b818322h), 2009-01-01
Supplement: b818322h.pdf [file b818322h.pdf]

## Supporting Information

Structural and photoluminescent studies of lanthanide complexes with tripodal triRNTB (N-substituted tris(benzimidazol-2-ylmethyl)amine): ligand substituent, anionic and secondary ligand effects

Mei Pan, Xiang-Li Zheng, Yu Liu, Wei-Sheng Liu, and Cheng-Yong Su

10

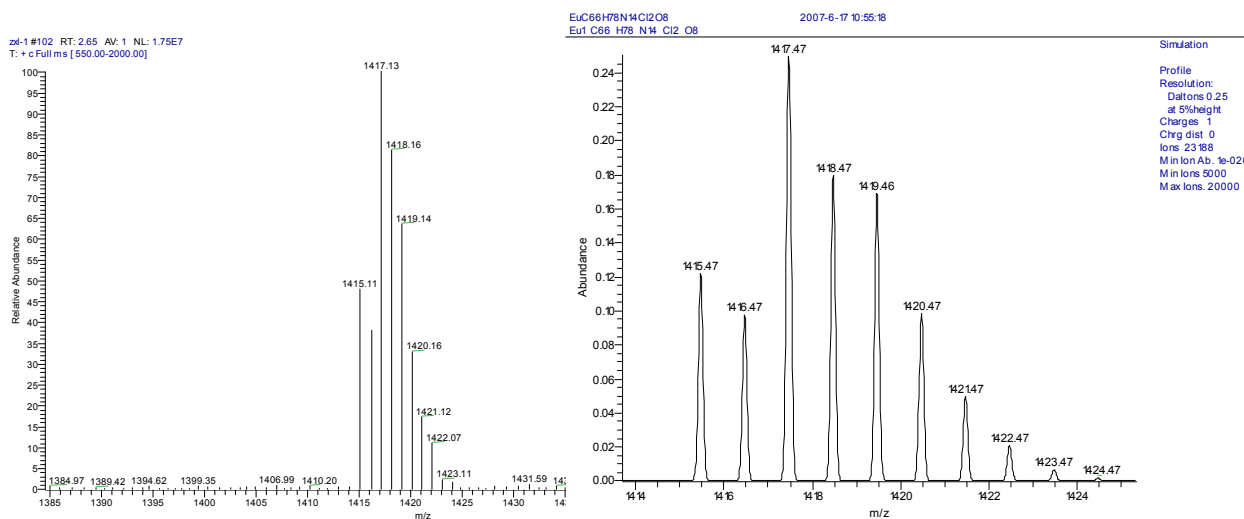

Figure S1 Partial ESI-MS spectrum of complex **2**: experimented (left) and simulated (right) for  $[\text{Eu}(\text{PrNTB})_2(\text{ClO}_4)_2]^+$  ( $m/z$  1417).

15

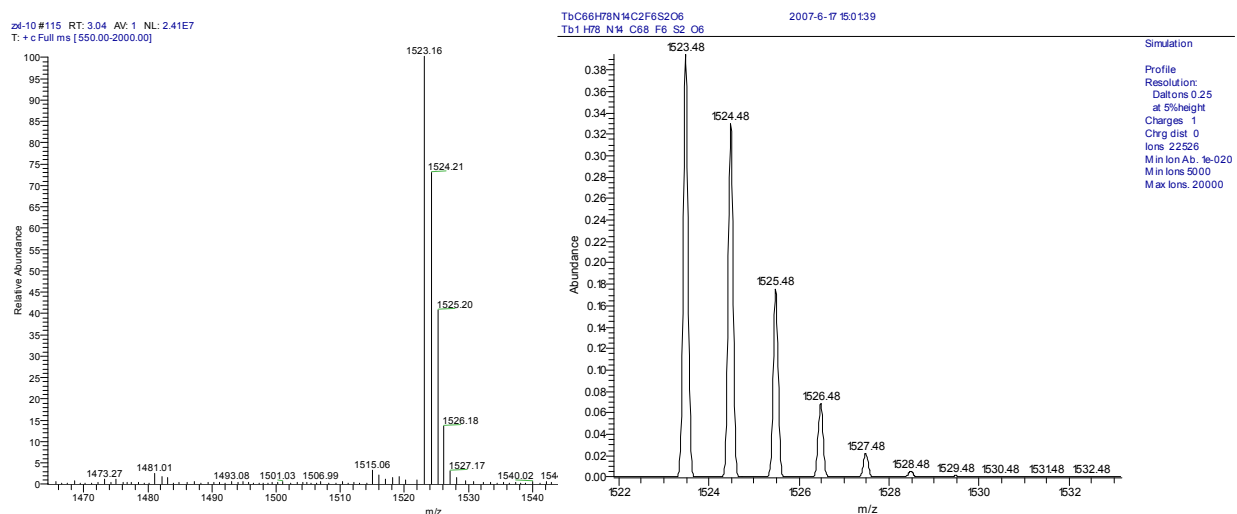

Figure S2 Partial ESI-MS spectrum of complex **12**: experimented (left) and simulated (right) for  $[\text{Tb}(\text{PrNTB})_2(\text{CF}_3\text{SO}_3)_2]^+$  ( $m/z$  1523).

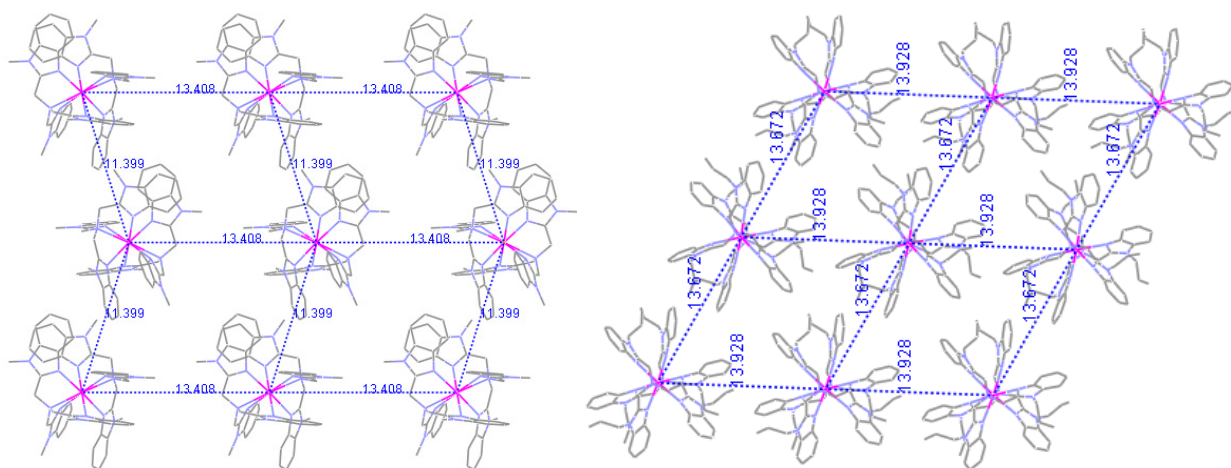

Figure S3 Crystal packing along *b* direction in complexes: (a) **18**, and (b) **5**.

**Table S1** Selected bond angles (deg) for the complexes.

|                        |                         |                         |                          |                         |
|------------------------|-------------------------|-------------------------|--------------------------|-------------------------|
| <b>5 Complex 5</b>     |                         |                         |                          |                         |
| N13-Eu1-N11 100.80(9)  | N13-Eu1-N6 82.50(9)     | N11-Eu1-N6 74.65(9)     | N13-Eu1-N2 174.76(9)     | N1-Eu1-N2 83.80(9)      |
| N6-Eu1-N2 101.24(9)    |                         | N13-Eu1-N9 100.88(9)    | N11-Eu1-N9 101.36(9)     | N6-Eu1-N9 175.28(9)     |
| N2-Eu1-N9 75.60(9)     |                         |                         |                          |                         |
| N13-Eu1-N4 73.98(9)    |                         | N11-Eu1-N4 173.59(10)   | N6-Eu1-N4 100.69(9)      | N2-Eu1-N4 101.58(9)     |
| N9-Eu1-N4 83.48(9)     |                         |                         |                          |                         |
| N13-Eu1-N8 63.34(8)    |                         | N11-Eu1-N8 62.78(8)     | N6-Eu1-N8 116.43(8)      | N2-Eu1-N8 117.40(8)     |
| N9-Eu1-N8 62.92(9)     |                         |                         |                          |                         |
| N4-Eu1-N8 116.75(8)    |                         | N13-Eu1-N1 116.03(8)    | N11-Eu1-N1 117.05(8)     | N6-Eu1-N1 62.81(9)      |
| N2-Eu1-N1 63.28(9)     |                         |                         |                          |                         |
| N9-Eu1-N1 117.87(9)    |                         | N4-Eu1-N1 63.32(9)      | N8-Eu1-N1 179.17(9)      |                         |
| <b>Complex 7</b>       |                         |                         |                          |                         |
| N4 -Eu1-N9 79.85(14)   | N4 -Eu1 -N2 102.40(14)  | N9 -Eu1 -N2 76.02(14)   | N4 -Eu1 -N13 175.53(14)  | N9 -Eu1 -N13 103.06(14) |
| N2 -Eu1 -N13 81.69(14) | N4 -Eu1 -N6 102.50(14)  | N9 -Eu1 -N6 176.29(15)  | N2 -Eu1 -N6 100.59(14)   | N13 -Eu1 -N6 74.77(14)  |
| N4 -Eu1 -N11 74.75(14) | N9 -Eu1 -N11 100.80(14) | N2 -Eu1 -N11 176.16(14) | N13 -Eu1 -N11 101.25(14) | N6 -Eu1 -N11 82.65(14)  |
| N4 -Eu1- N8 115.48(14) | N9 -Eu1 -N8 63.49(13)   | N2 -Eu1 -N8 116.07(14)  | N13 -Eu1 -N8 63.59(14)   | N6 -Eu1 -N8 117.42(13)  |
| N11 -Eu1 -N8 63.65(14) | N4 -Eu1 -N1 63.60(14)   | N9 -Eu1 -N1 115.48(13)  | N2 -Eu1 -N1 63.80(14)    | N13 -Eu1 -N1 117.38(14) |
| N6 -Eu1 -N1 63.64(13)  | N11 -Eu1 -N1 116.39(14) | N8 -Eu1 -N1 178.85(14)  |                          |                         |
| <b>30 Complex 9</b>    |                         |                         |                          |                         |
| O15 -Eu1 -O1 74.09(6)  | O15 -Eu1 -O8 78.18(6)   | O1 -Eu1 -O8 75.32(6)    | O15 -Eu1 -N2 123.54(6)   | O1 -Eu1 -N2 139.04(6)   |
| O8 -Eu1 -N2 73.57(6)   | O15 -Eu1 -N6 133.80(6)  | O1 -Eu1 -N6 74.08(7)    | O8 -Eu1- N6 123.81(6)    | N2 -Eu1 -N6 102.41(7)   |
| O15 -Eu1 -N4 74.83(6)  | O1 -Eu1 -N4 122.43(6)   | O8 -Eu1 -N4 140.72(7)   | N2 -Eu1 -N4 98.48(6)     | N6 -Eu1 -N4 95.44(7)    |
| O15 -Eu1 -O9 138.51(6) | O1 -Eu1 -O9 77.51(6)    | O8 -Eu1 -O9 65.68(6)    | N2 -Eu1 -O9 65.73(6)     | N6 -Eu1 -O9 62.39(6)    |
| N4 -Eu1 -O9 146.65(6)  | O15 -Eu1 -O16 64.62(6)  | O1 -Eu1 -O16 134.43(6)  | O8 -Eu1 -O16 78.11(6)    | N2 -Eu1 -O16 62.31(6)   |
| N6 -Eu1 -O16 150.58(6) | N4 -Eu1 -O16 64.74(6)   | O9 -Eu1 -O16 122.81(5)  | O15 -Eu1 -N1 134.68(6)   | O1 -Eu1 -N1 135.72(7)   |
| O8 -Eu1 -N1 133.93(6)  | N2 -Eu1 -N1 61.39(7)    | N6 -Eu1 -N1 61.97(7)    | N4 -Eu1 -N1 60.40(6)     | O9 -Eu1 -N1 86.51(6)    |
| O16 -Eu1 -N1 88.79(6)  | O15 -Eu1 -O2 73.24(6)   | O1 -Eu1 -O2 62.54(6)    | O8 -Eu1 -O2 133.89(6)    | N2 -Eu1 -O2 152.43(7)   |
| N6 -Eu1 -O2 62.63(6)   | N4 -Eu1 -O2 62.64(6)    | O9 -Eu1 -O2 118.33(6)   | O16 -Eu1 -O2 118.72(6)   | N1 -Eu1 -O2 91.14(6)    |
| <b>Complex 12</b>      |                         |                         |                          |                         |
| N1 -Eu1 -N3 95.42(11)  | N1 -Eu1 -N5 108.81(10)  | N3 -Eu1 -N5 99.39(10)   | N1 -Eu1 -Cl1 85.93(8)    | N3- Eu1 -Cl1 178.62(9)  |
| N5 -Eu1 -Cl1 79.88(7)  | N1- Eu1 -Cl3 82.21(8)   | N3 -Eu1 -Cl3 88.79(7)   | N5 -Eu1 -Cl3 165.38(8)   | Cl1 -Eu1 -Cl3 91.67(3)  |

N1 -Eu1 -Cl2 167.66(7)    N3 -Eu1 -Cl2 85.84(8)    N5 -Eu1 -Cl2 83.01(8)    Cl1 -Eu1 -Cl2 92.89(4)    Cl3 -Eu1 -Cl2 85.55(4)  
 N1 -Eu1 -N7 63.69(10)    N3 -Eu1 -N7 63.14(9)    N5 -Eu1 -N7 63.10(10)    Cl1 -Eu1 -N7 117.37(7)    Cl3 -Eu1 -N7 131.48(8)  
 Cl2 -Eu1 -N7 126.99(8)

5 **Complex 13**

N11 -Tb1 -N51 82.09(19)    N11 -Tb1 -N21 101.67(18)    N51 -Tb1 -N21 175.24(18)    N11 -Tb1 -N41 176.7(2)    N51 -Tb1 -N41 101.01(19)  
 N21 -Tb1 -N41 75.31(19)    N11 -Tb1 -N31 101.50(19)    N51 -Tb1 -N31 74.74(19)    N21 -Tb1 -N31 101.49(19)    N41-Tb1-N31 80.62(19)  
 10 N11-Tb1-N61 74.78(19)    N51-Tb1-N61 101.82(19)    N21-Tb1-N61 82.11(19)    N41-Tb1-N61 103.2(2)    N31-Tb1-N61 175.38(18)  
 N11-Tb1-N2 117.12(18)    N51-Tb1-N2 63.76(19)    N21-Tb1-N2 116.33(19)    N41-Tb1-N2 63.69(18)    N31-Tb1 -N2 116.21(19)  
 N61-Tb1-N2 64.05(19)    N11-Tb1-N1 63.52(18)    N51-Tb1- N1 116.21(18)    N21-Tb1-N1 63.63(18)    N41-Tb1-N1 115.69(18)  
 15 N31-Tb1-N1 63.19(19)    N61-Tb1-N1 116.59(19)    N2 -Tb1-N1 179.28(18)

**Complex 18**

N11- Tb1 -N5 81.9(2)    N11- Tb1- N7 74.7(2)    N5 -Tb1 -N7 99.6(2)    N11 -Tb1 -N13 97.3(3)    N5 -Tb1 -N13 174.8(2)  
 20 N7 -Tb1 -N13 85.1(2)    N11 -Tb1 -N3 169.5(2)    N5 -Tb1 -N3 107.2(2)    N7 -Tb1 -N3 98.3(2)    N13 -Tb1 -N3 74.1(2)  
 N11 -Tb1 -N9 107.7(2)    N5 -Tb1 -N9 77.2(2)    N7 -Tb1 -N9 175.5(2)    N13 -Tb1 -N9 98.3(2)    N3 -Tb1 -N9 79.8(2)  
 N11 -Tb1 -N1 117.2(2)    N5 -Tb1 -N1 63.4(2)    N7 -Tb1 -N1 63.0(2)    N13 -Tb1 -N1 121.2(2)    N3 -Tb1 -N1 64.5(2)  
 N9 -Tb1 -N1 112.5(2)    N11 -Tb1 -N8 63.4(2)    N5- Tb1 -N8 112.2(2)    N7 -Tb1 -N8 121.4(2)    N13- Tb1 -N8 63.1(2)  
 N3 -Tb1 -N8 115.9(2)    N9 -Tb1 -N8 63.0(2)    N1- Tb1 -N8 174.9(2)

25 **Complex 22**

O1 -Tb1 -O1#1 93.33(13)    O(1)-Tb(1)-O(1)#2 93.33(13)    O1 -Tb1 -N2#2 85.85(13)    O1#1 -Tb1 -N2#2 78.03(13)  
 O1#2 -Tb1 -N2#2 171.25(13)    N2 -Tb1 -N2 102.46(10)    N2 -Tb1 -N2 102.46(10)    O1- Tb1 -N1 122.87(9)    N2 -Tb1 -N1 64.20(9)

30 **Complex 27**

O15- Sm1 -O8 75.42(10)    O15- Sm1 -O1 74.25(9)    O8 -Sm1 -O1 78.74(9)    O15 -Sm1 -N6 138.34(9)    O8 -Sm1 -N6 73.29(10)  
 O1 -Sm1 -N6 124.41(9)    O15 -Sm1 -N2 73.99(10)    O8 -Sm1 -N2 122.77(9)    O1 -Sm1 -N2 134.37(9)    N6 -Sm1 -N2 101.04(9)  
 35 O15 -Sm1 -N4 124.11(9)    O8 -Sm1 -N4 141.08(10)    O1 -Sm1 -N4 76.08(9)    N6 -Sm1 -N4 97.44(9)    N2 -Sm1 -N4 95.95(10)  
 O15 -Sm1 -O9 77.02(9)    O8 -Sm1 -O9 64.72(9)    O1 -Sm1 -O9 138.00(9)    N6 -Sm1 -O9 65.07(9)    N2 -Sm1 -O9 61.96(9)  
 N4 -Sm1 -O9 145.91(9)    O15- Sm1 -O2 134.37(9)    O8- Sm1 -O2 78.16(9)    O1 -Sm1 -O2 64.50(8)    N6 -Sm1 -O2 63.32(8)  
 40 N2 -Sm1- O2 150.91(9)    N4 -Sm1 -O2 64.37(10)    O9 -Sm1 -O2 122.73(8)    O15 -Sm1 -O16 62.65(10)    O8 -Sm1 -O16 134.01(9)  
 O1 -Sm1 -O16 72.71(10)    N6 -Sm1 -O16 152.53(10)    N2- Sm1-O16 63.87(9)    N4 -Sm1 -O16 63.75(9)    O9 -Sm1 -O16 118.87(9)  
 O2 -Sm1 -O16 118.33(9)    O15 -Sm1 -N1 135.10(10)    O8 -Sm1 -N1 132.85(9)    O1 -Sm1 -N1 135.81(8)    N6 -Sm1 -N1 60.74(10)  
 45 N2- Sm1- N1 61.36(9)    N4 -Sm1 -N1 60.15(9)    O9 -Sm1 -N1 85.89(9)    O2 -Sm1 -N1 89.69(9)    O16 -Sm1 -N1 91.89(9)

**Complex 29**

O5-Sm1-O7 70.5(2)    O5-Sm1- O1 68.8(2)    O7-Sm1- O1 72.3(2)    O5-Sm1-O2 115.5(2)    O7-Sm1-O2 71.8(2)  
 50 O1-Sm1-O2 50.6(2)    O5-Sm1-O4 49.9(2)    O7- Sm1-O4 117.5(2)    O1-Sm1- O4 70.6(2)    O2-Sm1-O4 115.1(2)  
 O5-Sm1-O8 71.8(2)    O7-Sm1-O8 50.7(2)    O1-Sm1-O8 118.4(2)    O2-Sm1 -O8 116.5(2)    O4-Sm1 -O8 113.8(2)  
 O5-Sm1-N2 119.4(2)    O7-Sm1-N2 143.1(2)    O1-Sm1-N2 78.8(2)    O2-Sm1-N2 72.2(2)    O4-Sm1-N2 71.7(2)  
 O8-Sm1-N2 162.7(2)    O5- Sm1-N4 78.0(2)    O7-Sm1-N4 118.5(2)    O1-Sm1-N4 139.2(2)    O2-Sm1-N4 166.0(2)  
 O4 -Sm1-N4 69.9(2)    O8-Sm1-N4 70.0(2)    N2-Sm1-N4 98.3(2)    O5-Sm1-N6 141.6(2)    O7-Sm1-N6 76.2(2)  
 55 O1-Sm1-N6 118.3(2)    O2-Sm1-N6 69.7(2)    O4-Sm1-N6 166.1(2)    O8-Sm1-N6 72.6(2)    N2-Sm1-N6 98.7(2)  
 N4-Sm1-N6 102.5(2)    O5 -Sm1 -N1 139.4(2)    O7-Sm1-N1 135.7(2)    O1-Sm1-N1 139.4(2)    O2-Sm1-N1 103.7(2)  
 O4-Sm1-N1 104.4(2)    O8-Sm1-N1 100.7(2)    N2-Sm1-N1 62.1(2)    N4-Sm1-N1 62.4(2)    N6-Sm1-N1 61.7(2)  
 O5-Sm1-N8 91.3(2)    O7 -Sm1 -N8 68.1(2)    O1-Sm1-N8 25.3(2)    O2-Sm1-N8 25.5(2)    O4 -Sm1 -N8 93.7(2)  
 O8-Sm1 -N8 118.8(2)    N2-Sm1-N8 75.9(2)    N4-Sm1-N8 163.6(2)    N6-Sm1-N8 93.6(2)    N1-Sm1-N8 124.8(2)  
 60 O5-Sm1-N10 66.8(2)    O7-Sm1-N10 25.1(2)    O1-Sm1-N10 94.2(2)    O2-Sm1-N10 94.9(2)    O4-Sm1-N10 116.5(2)  
 O8-Sm1 N10 25.8(2)    N2-Sm1-N10 167.1(2)    N4-Sm1-N10 94.0(2)    N6-Sm1-N10 74.9(2)    N1-Sm1 -N10 121.7(2)  
 N8-Sm1-N10 93.1(2)
